# Supplementary material
Source: publisher site journal article supplement (https://www.dovepress.com/article/supplementary_file/579207/old%20579207_Supplementary%20tables%20&%20figures_1.docx)
Supplement: Supplementary file 1 [file old%20579207_Supplementary%20tables%20&%20figures_1.docx]

**Supplementary Table** 1 Steroidal saponins in genus Lilium

| **No** | **Compound Name** | **Source** | **Ref** |
| --- | --- | --- | --- |
| 1 | deacylbrownioside | a | 17 |
| 2 | 27-*O*- (3-hydroxy- 3- methylglutaroyl) spirost- 5- ene-3*β*, 27-diol (isonarthogenin) - 3- *O*- α- L- rha- (1→2) - *O*- [*β-D*-glu- (1→4)]-*β-D*-glucoside | a | 17 |
| 3 | 27-*O*-[(3S)-3-*O*-*β-D*-glu-3-methylglutaroylisonarthogenin-3-*O*-[α-L-rha-(1→2)]-*β-D*-glucoside | a | 18 |
| 4 | brownioside | a | 19 |
| 5 | (25S)-27-hydroxyspirostan-5-en-3β-*O*-α-L-Rha-(1→2)-*O*-[*β-D*-Glc-(1→6)] *β-D*-Gls | b | 20 |
| 6 | (25S)-spirost-5-ene-3β,27-diol3-*O*-{*O*-α-L-Rha-(1→2)-*O*-[*β-D*-Glc-(1→4)] *β-D*-Gls} | c | 21 |
| 7 | (25S)-spirost-5-ene-3β,27-diol3-*O*-{*O*-α-L-Rha-(1→2)-*O*-[α-L-Ara-(1→3)] *β-D*-Gls} | c | 21 |
| 8 | (25R)-27-*O*-HMG-spirost-5-ene-3β, 27-diol3-*O*{-*O*-α-L-Rha-(1→2)-*O*-[α-L-Ara-(1→3)] *β-D*-Glc | c | 21 |
| 9 | isonarthogenin3-*O*-{*O*-*β-D*-Glc-(1→3)-*O*-α-L-Rha-(1→2)-*O*-[*β-D*-Glc-(1→4)] *β-D*-Glc} | b | 22 |
| 10 | (24S, 25S)-3*β*, 17α, 24- trihydroxy- 5α- spirostan- 6- one-3-*O*- [α-L-rha- (1→2)]-*β-D*-glucoside | a | 22 |
| 11 | (25R) - 3*β*-hydroxy- 5α- spirostan- 6- one-3-*O*-α-L-rha- (1→2) -*β-D*-glucoside | d, e | 23 24 |
| 12 | (25R) - 3*β*, 17α- dihydroxy- 5α- spirostan- 6- one-3-*O*- α- L- rha- (1→2) -*β-D*- glucoside | d, a, e | 23 18 |
| 13 | pumilum A | e | 24 |
| 14 | (25R) - 3*β*, 17α- dihydroxy- 5α- spirostan- 6- one-3-*O-* α- L-rha- (1→2) -*O*- [α-L-ara- (1→3)]-*β-D*-glucoside | a, d, e | 25 |
| 15 | (25R) - 3*β*-hydroxy- 5α- spirostan- 6- one-3-*O*-α- L-ara- (1→6) -*β-D*-glucoside | e | 24 |
| 16 | (25R)-27-*O*-[(S) - 3-hydroxy- 3- methylglutaryl]- spirost- 5α-3*β*, 27-diol-3-*O*-α-L-rha- (1→2)-*β-D*-glucoside | a | 26 |
| 17 | (25R)-5α- spirostan-3*β*, 17α-diol-3-*O-β-D*-xyl- (1→4) - [α-L-ara- (1→6)]-*β-D*-glucoside | e | 24 |
| 18 | brownioside | a | 17 |
| 19 | (25R) - spirost- 5- ene-3*β-Ο*-α-L-rha- (1→2) - [*β-D*-glu- (1→6)]-*β-D*-glucoside | d | 23 |
| 20 | (25R, 26R) -26- methoxyspirost- 5- ene-3*β- Ο*-α-L-rha- (1→2) - [*β-D*-glu- (1→6)]-*β-D*-glucoside | d | 27 |
| 21 | (25R,26R) - 17α- hydroxy- 26- methoxyspirost- 5- ene- 3*β- O*- α- L-rha- (1→2) - [*β-D*-glu- (1→6)]-*β- D*- glucoside | d | 27 23 |
| 22 | dioscin | a, d, e | 24 28 |
| 23 | ophiopogonin D' | d | 29 |
| 24 | lililancifoloside A | d | 29 |
| 25 | 26-*O*-*β-D*-glu- nuatigenin | a | 18 |
| 26 | 26-*O-β-D*-glu- nuatigenin-3-*O*-*β-D*-glucoside | a | 18 |
| 27 | 26-*O*-*β-D*-glu- nuatigenin-3-*O*- [α-L-rha- (1→2)]-*β-D*-glucoside | a | 18 |
| 28 | 26-*O*-*β-D*-glu- nuatigenin-3-*O*-α-L-rha-(1→2)-*O*-[*β-D*-glu-(1→4)]-*β-D*- glucoside | a | 18 |
| 29 | 26-*O*-*β-D*-glu- nuatigenin-3-*O*-α-L-rha- (1→2) - [*β-D*-glu- (1→6)]-*β-D*-glucoside | a | 18 |
| 30 | 26-*O*- [*β-D*-glu-(1→2)]-*β-D*-glu-nuatigenin-3-*O*- [α- L-rha- (1→2)]-*β-D*- glucoside | a | 18 |
| 31 | (25R) - 26-*O*-*β-D*-glu- 22α- hydroxyfurost- 5- en-3β- *O*- α- L-ara- (1→3) -*O*-[*β-D*-glu-(1→4)]- *O*- [α-L-rha-(1→2)] -*β-D*- glucoside | e | 30 |
| 32 | (25R) - 26-*O*-*β-D*-glu- 22α- hydroxyfurost- 5- en-3β- *O*- α- L-ara- (1→4) -*O*- [*β-D*-glu-(1→3)]- *O*- [α-L-rha- (1→2)] -*β-D*- glucoside | e | 31 |
| 33 | (25R) - 26-*O*-*β-D*-glu- furosta- 5, 20(22) - dien-3β-*Ο*-α-L-ara- (1→3) -*O-* [*β-D*-glu-(1→4)]-*O*- [α-L-rha- (1→2)]-*β-D*- glucoside | e | 31 |
| 34 | (25R) - 26-*O*-*β-D*-glu- furosta- 5, 20(22) - dien-3β-*O*-α-L-ara- (1→4) -*O-* [*β-D*-glu- (1→3)]- *O*- [α- L-rha- (1→2)]-*β-D*- glucoside | e | 31 |
| 35 | (25R)-26-*O*-*β-D*-glu- furost-5-en-3β, 22α, 26-triol-3-*O*-α-L-rha- (1→2) - [*β-D*-glu- (1→4)]-*β-D*- glucoside | d | 25 |
| 36 | tenuifolioside A | a, e | 32 |
| 37 | tenuifolioside B | a, e | 32 |
| 38 | tenuifoliol 3-*O*-[*β-D*-glu-(1→4)]-*β-D*-glucoside | e | 18 |
| 39 | 26-*O*-*β-D*-glu-3β,26-dihydroxy cholestan-16,22-dioxo-3-*O*-α-rha (1→2)-*β-D*-glucoside | a | 33 |
| 40 | 26-*O*-*β-D*-glu-3β,26-dihydroxy-5-cholesten-16,22-dioxo-3-*O*-α-rha (1→2)-*β-D*-glucoside | a | 33 |
| 41 | β-sitosterol | a | 33 |
| 42 | daucosterol | a, d | 33 |
| 43 | stigmasterol | a, d | 34 |
| 44 | stigmasterol-3-*β-D*-glucoside | a, d | 34 |
| 45 | 22-*O*-methyl-26-*O*-β-D-Glc-(25R)-furost-5-ene-3β,22ξ,26-triol-3-*O*-{*O*-α-L-Rha-(1→2)- [ *β-D* -Gls-(1→4)] *β-D*-Gls} | d | 22 |
| 46 | 22-*O*-methyl-26-*O*-*β-D*-Glc-(25R)-furost-5-ene-3β,22ξ,26-triol-3-*O*-{*O*-α-L-Rha-(1→2)-*O*-[α-L-Ara-(1→3)] *β-D*-Gls} | c, b | 21 |
| 47 | 22-*O*-methyl-26-*O*-*β-D*-Glc-(25R)-furost-5-ene-3β,22ξ,26-triol-3-*O*-{*O*-α-L-Rha-(1→2)-*O*-[*β-D*-Xyl-(1→3)] *β-D*-Gls} | c | 21 |
| 48 | (25R)-26-*O*-*β-D*-Glc-22-*O*-methylfurost-5-ene-3β,22ξ,26-triol-3-*O*-{*O*-α-L-Rha-(1→2) *β-D*-Gls} | c | 22 |
| 49 | (25R)-26-(*β-D*-Glc)-22-methylfurost-5-ene-3β-yl-*O*-α-L-Rha-(1→2)-*O*-[*β-D*-Glc-(1→6)] *β-D*-Gls | b | 22 |
| 50 | 27-*O*-HMG-isonarthogenin-3-*O*-α-L-Rha-(1→2)-*O*-[*β-D*-Glc-(1→4)] *β-D*-Gls | b | 18 |
| 51 | (25R)-26-*O*-(*β-D*-Glc)-furost-5-en-3β,22R,26-triol3-*O*-α-L-Rha-(1→2)-*O*-[*β-D*-Glc-(1→4)]- *β-D* -Gls | f | 35 |
| 52 | (25R)-26-*O*-(*β-D*-Glc)-furost-5-en-3β,22R,26-triol-3-*O*-α-L-Rha-(1→2)-*O*-[α-L-Ara-(1→3)] *β-D*-Gls | c | 35 |
| 53 | (25R)-26-*O*-(*β-D*-Glc)-furost-5-en-3β,22R,26-triol-3-*O*-α-L-Rha-(1→2)-*O*-[α-L-Xyl-(1→3)] *β-D*-Gls | c | 36 |

**Note**: a: L.brownii: b: L.candidum; c: L.longiflorum; d: L.lancifolium; e: L.pumilum; f: L.brownii var.colchesten; g: L.auratum; h: L.concolor; i: L.martagon; j: L.hansonii; k: L.leucanthum; l: L.davidii; m: L.regale; n: L.lspeciosum;


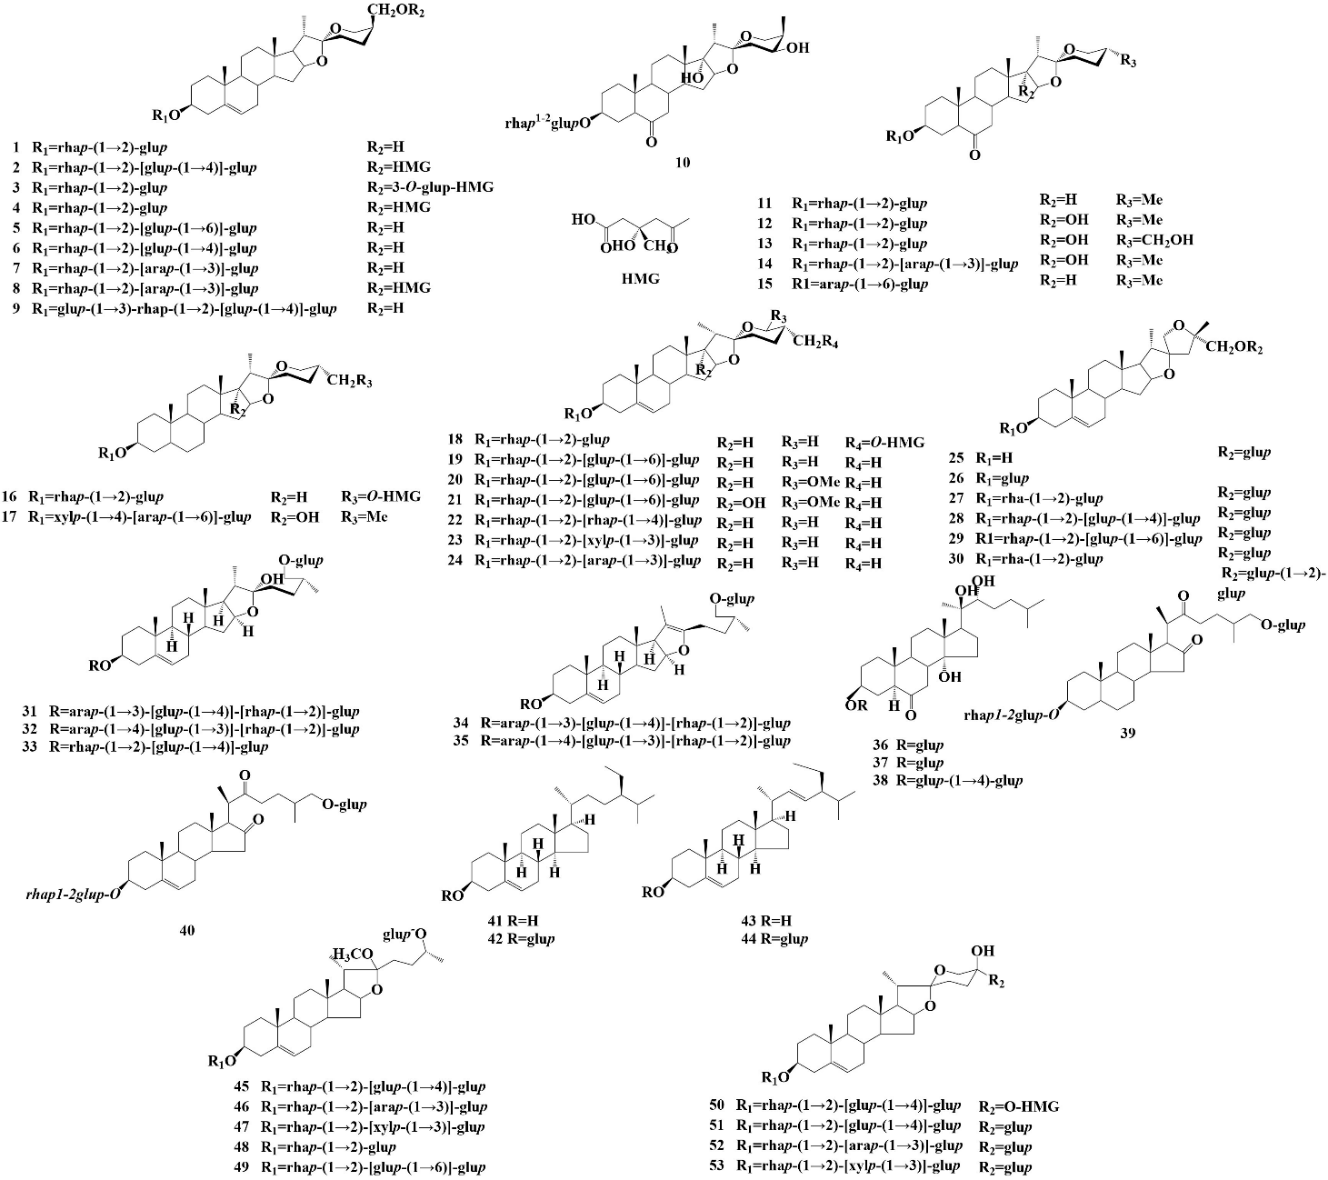


**Supplementary Figure 1** Steroidal saponins structures in genus Lilium

**Supplementary Table** 2 Phenolics in genus Lilium

| **No.** | **Compound Name** | **Source** | **Ref** |
| --- | --- | --- | --- |
| 54 | 1-*O*-feruloylglycerol | g | 36 |
| 55 | 1-*O*-caffeoylglycerol | d | 36 |
| 56 | 1-*O*-*p*-coumaroylglycerol | d, a, e | 36 |
| 57 | p-Coumaric acid | d | 37 |
| 58 | Ferulic Acid | d, h | 37 |
| 59 | Chlorogenic acid | d, h | 37 |
| 60 | 6′-*O*-feruloylsucrose | n | 38 |
| 61 | 3,6′-diferuloylsucrose | n | 38 |
| 62 | regaloside F | d | 39, 40 |
| 63 | 1-*O*-caffeoyl-3-*O*-*p*-coumaroylglycerol | d | 36 |
| 64 | 1,3-*O*-diferuloylglycerol | d, a, e | 36, 27 |
| 65 | 1-*O*-feruloyl-3-*O*-*p*-coumaroylglycerol | d, a, e | 36 |
| 66 | 1,3-*O*-di-*p*-coumaroylglycerol | d | 36 |
| 67 | 1,2-*O*-diferuloylglycerol | d, a, e | 36, 27 |
| 68 | 1-*O*-feruloyl-2-*O*-*p*-coumaroylglycerol | a, e | 27 |
| 69 | 1-*O*-*p*-coumaroyl-2-*O*-feruloylglycerol | d, a, e | 27 |
| 70 | regaloside A | n | 40 |
| 71 | regaloside B | g, c | 27 |
| 72 | regaloside D | g, c | 27 |
| 73 | regaloside H | g, c | 39 |
| 74 | regaloside C | i | 40 |
| 75 | regaloside E | d | 40 |
|  |  |  |  |

**Note**: a: L.brownii: b: L.candidum; c: L.longiflorum; d: L.lancifolium; e: L.pumilum; f: L.brownii var.colchesten; g: L.auratum; h: L.concolor; i: L.martagon; j: L.hansonii; k: L.leucanthum; l: L.davidii; m: L.regale; n: L.lspeciosum;


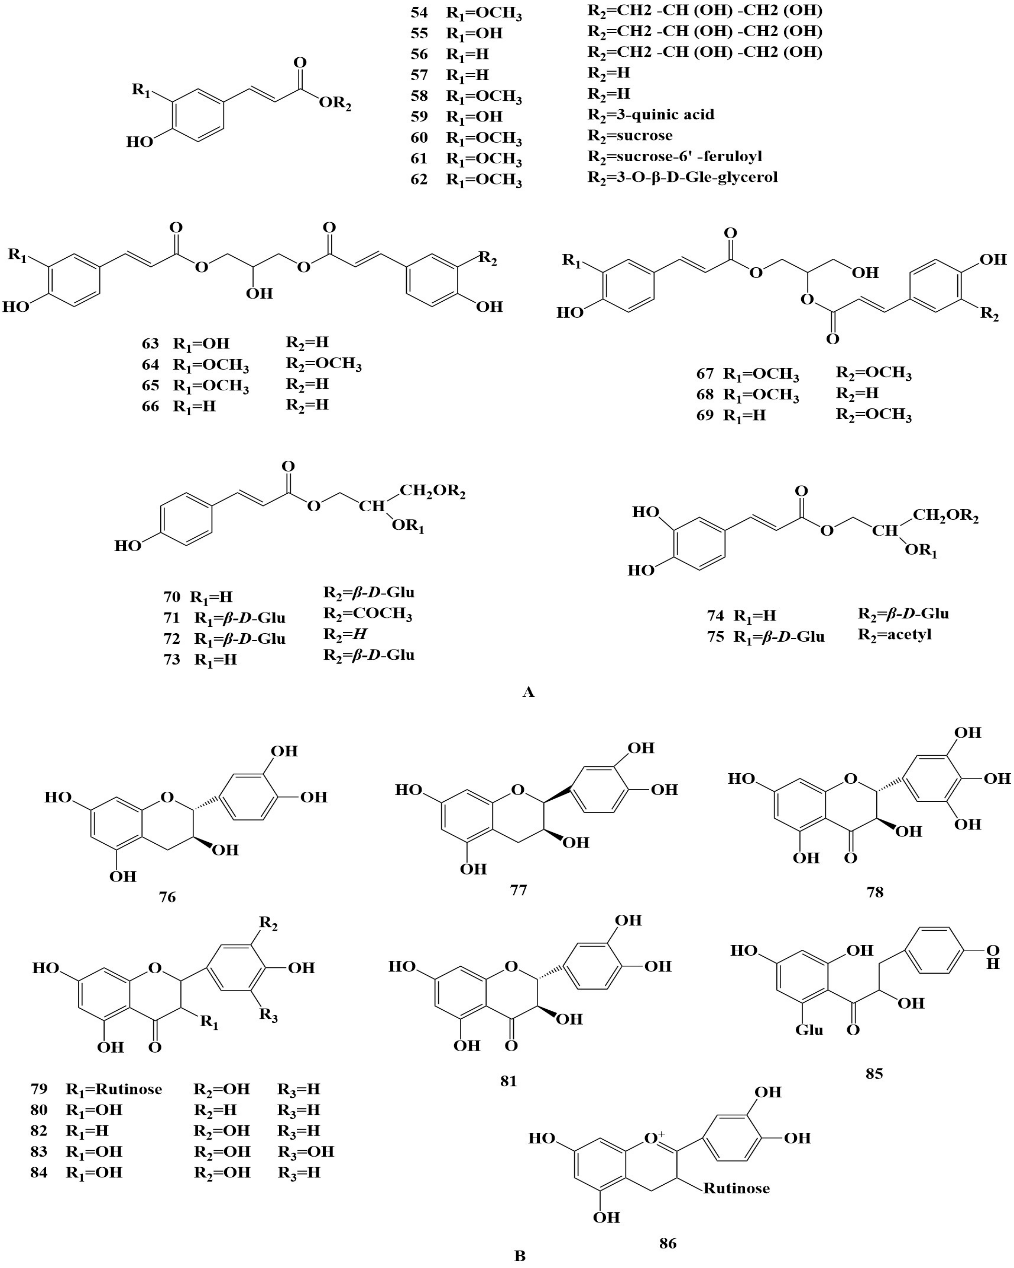


**Supplementary Figure 2** Phenolics (A) and Flavonoids (B) structures in genus Lilium

**Supplementary Table** 3 Flavonoids compounds in genus Lilium

| **No.** | **Compound Name** | **Source** | **Ref** |
| --- | --- | --- | --- |
| 76 | (+)-Catechin | d, h, k, l, m, e | 41. 42 |
| 77 | (-)-Epicatechin | d, h, k, l, m, e | 41 |
| 78 | Dihydromyricetin | d, h, k, l, m, e | 42 |
| 79 | Rutin | d | 41, 43 |
| 80 | Kaempferol | d, h, k, l, m, e | 41, 43 |
| 81 | Dihydroquercetin | d | 42 |
| 82 | Eriodictyol | d | 42 |
| 83 | Myricetin | d | 41, 43 |
| 84 | Quercetin | d, h, k, l, m, e | 41, 43 |
| 85 | Phloridzin | d, k, l, m, e | 43 |
| 86 | Cyanidin 3-rutinoside | d, e | 41 |

**Note**: a: L.brownii: b: L.candidum; c: L.longiflorum; d: L.lancifolium; e: L.pumilum; f: L.brownii var.colchesten; g: L.auratum; h: L.concolor; i: L.martagon; j: L.hansonii; k: L.leucanthum; l: L.davidii; m: L.regale; n: L.lspeciosum;

**Supplementary Table** 4 Alkaloidsand other components in the genus Lilium

| **No.** | **Compound Name** | **Source** | **Ref** |
| --- | --- | --- | --- |
| 87 | Jatropham | j | 44 |
| 88 | Jatropham 5-*O*-*β-D*-glucopyranoside | j | 44 |
| 89 | Jatropham 5-*O*-*β-D*-ghtcopyranosyl-(1→3)-*β-D*-glucopyranoside | j | 44 |
| 90 | Jatropham 5-*O*-(6-*O*-p-coumaroyl-*β-D*-glucopyranoside) | i | 44 |
| 91 | (22R,25R)-spirosol-5-en-3*β*-yl-3-*O*-*α-L*-rhamnopyranosyl-(1→2)-*β-D*-glucopyranoside | a | 40 |
| 92 | (22R,25R)-spirosol-5-en-3*β*-yl-3-*O*-*α-L*-rhamnopyranosyl-(1→2)-*O*-[*β-D*-glucopyranosyl-(1→4)]-*β-D*-glucopyranoside | a, c | 40 |
| 93 | (22R,25R)-spirosol-5-en-3*β*-yl-3-*O*-*α-L*-rhamnopyranosyl-(1→2)-*O*-[6-*O*-acetyl-*β-D*-glucopyranosyl-(1→4)]-*β-D*-glucopyranoside | c | 36 |
| 94 | Etioline | j | 45 |
| 95 | Lilaline | j | 45 |
| 96 | Berberine | d | 28 |
| 97 | Colchicine | j | 28 |
| 98 | β-lumicolchicine | a | 28 |
| 99 | (22R, 25R)-spirosol-5α-3β-*O*-[α-L-rha-(1→2)]-*β-D*-glucoside | d | 46 |
| 100 | adenosine | d | 28 |
| 101 | 2'-deoxyadenosine | d | 40 |
| 102 | *n*-tetratriacontanol | d | 32 |
| 103 | nonacosanol | d | 26 |
| 104 | n-docosane acid | d | 26 |
| 105 | heneicosanoic acid | d | 26 |
| 106 | eicosanoic acid | d | 32 |
| 107 | vanillic acid | a, d | 37 |
| 108 | salicylic acid | d | 24 |
| 109 | Gallic acid | d, e | 44 |
| 110 | syringic acid | a, d | 37 |
| 111 | protocatechualdehyde | d | 47 |
| 112 | p-hydroxybenzaldehyde | d | 32 |
| 113 | n-butyl-β-D- fructopyranoside | a | 34 |
| 114 | methyl-β-D- fructofuranoside | a | 21 |
| 115 | methyl-α- D- glucopyranoside | d | 28 |
| 116 | methyl-α-D-mannopyranoside | d | 28 |
| 117 | 2,4,6-trichlorol-3-methyl-5-methoxy-phenol-1-O-β-D-glu-(1→6)-β-D-glucopyranoside | a | 48 |
| 118 | 4-chlorol-5-hydroxyl-3-methyl-phenol-1-O-α-L-rha-(1→6)-β-D-glucopyranoside | a | 48 |
| 119 | threo-1-(4'-hydroxy-2'-methoxyphenyl)-2-(2'',4''-dihydroxyphenyl)-1,3-propanediol- 4'-O-β-D-glucopyranoside | a, e | 49 |

**Note**: a: L.brownii: b: L.candidum; c: L.longiflorum; d: L.lancifolium; e: L.pumilum; f: L.brownii var.colchesten; g: L.auratum; h: L.concolor; i: L.martagon; j: L.hansonii; k: L.leucanthum; l: L.davidii; m: L.regale; n: L.lspeciosum;


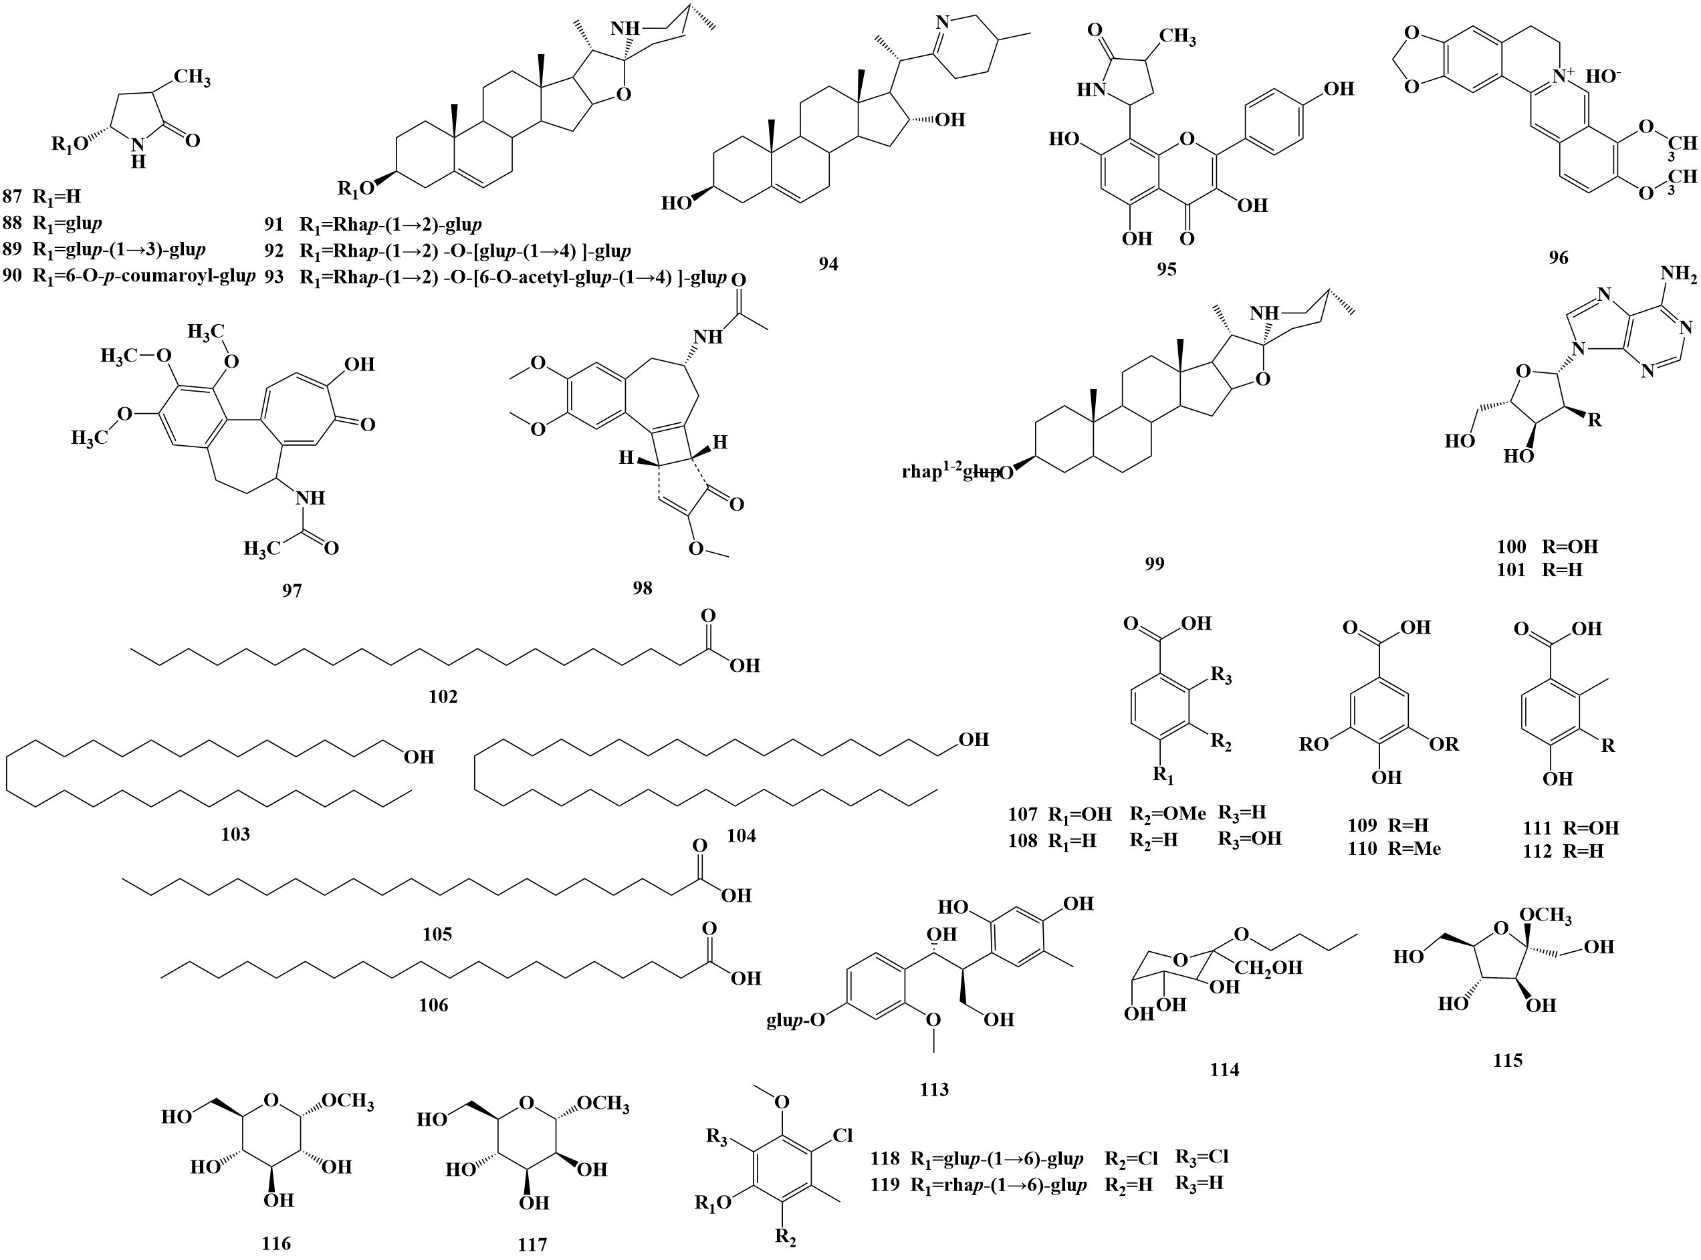


**Supplementary Figure 3** Alkaloids and Other component structures in genus Lilium

**Supplementary Table** 5 Iridoids in R. glutinosa

| **No.** | **Compound Name** | **Source** | **Ref** | **No.** | **Compound Name** | **Source** | **Ref** |
| --- | --- | --- | --- | --- | --- | --- | --- |
| 1 | Rehmannoside A | a, b, c | 52 | 45 | Genipin | a | 53 |
| 2 | Rehmannoside B | a, b, c | 52 | 46 | Geniposide | a, b | 53 |
| 3 | Rehmannoside C | a | 52 | 47 | Gardoside | a | 54 |
| 4 | Rehmannoside D | a, b, d | 52 | 48 | Gardoside methyl ester | a | 55 |
| 5 | Rehmaglutoside A | a | 56 | 49 | Genipin-1-b-D-gentiobioside | a | 54 |
| 6 | Rehmaglutoside B | a | 56 | 50 | Genipin 1-O-α-L-rhamnopyranosyl (1→6)-β-D-glucopyranoside | a | 55 |
| 7 | Rehmaglutoside C | a | 56 |
| 8 | Rehmaglutoside D | a | 56 | 51 | Genipinic Acid | a | 55 |
| 9 | Rehmaglutoside E | a | 56 | 52 | Leonuride | a, b, d | 52 |
| 10 | Rehmaglutoside F | a | 56 | 53 | Ajugoside | a | 53 |
| 11 | Rehmaglutoside G | a | 56 | 54 | Melittoside | a, b, d | 52 |
| 12 | Rehmaglutoside H | a | 56 | 55 | Monomelittoside | a, b, d | 52 |
| 13 | Rehmaglutoside I | a | 56 | 56 | Aucubin | a, d | 52 |
| 14 | Rehmaglutoside J | a | 56 | 57 | 6-O-E-feruloylajugol | b, d | 52 |
| 15 | Rehmaglutoside K | a | 56 | 58 | 6-O-Z-feruloylajugol | b | 52 |
| 16 | Jiorehmannoside A | a | 53 | 59 | 6-O-p-coumaroyl ajugol | b | 52 |
| 17 | Jiorehmannoside B | a | 53 | 60 | 6-O-p-hydroxybenzoate ajugol | b | 52 |
| 18 | Rehmannin A | b, c | 57 | 61 | 6-O-vanilloylajugol | b, d | 52 |
| 19 | Rehmannin B | b | 57 | 62 | 6-O-E-caffeoyl ajugol | a | 55 |
| 20 | Rehmannin C | b, c | 57 | 63 | 6-O-sec-hydroxyaeginetoyl ajugol | a | 58 |
| 21 | Rehmannin D | b | 57 | 64 | 6-O-(4"-O-α-L-rhamnopyranosyl) vanillate ajugol | a | 52 |
| 22 | Rehmannin E | d | 55 |
| 23 | Rehmannin F | d | 55 | 65 | Aeginetoyl ajugol 5"-O-β-D-quinovoside | a | 59 |
| 24 | Rehmannin G | d | 55 | 66 | 6β-hydroxy-2-oxabicyclo[4.3.0]Δ8-9-nonen-1-one | a | 54 |
| 25 | Rehmachinin | d | 60 | 67 | Dihydroverbenalin | b | 57 |
| 26 | Jioglutin A | c | 53 | 68 | 8-Epiloganic acid | b, d | 52 |
| 27 | Jioglutin B | c | 53 | 69 | Neorehmannioside G | b | 61 |
| 28 | Jioglutin C | ct | 53 | 70 | Jiofuraldehyde dimethyl acetal | b | 61 |
| 29 | Jioglutin D | b | 53 | 71 | Myoporoside | a | 62 |
| 30 | Jioglutin E | b | 53 | 72 | 5-deoxyantirrhinoside | a | 62 |
| 31 | Jioglutin F | a | 55 | 73 | Myobontioside A | a | 55 |
| 32 | Jioglutolide | b, c | 53 | 74 | 3'-O-β-D-glucopyranosyl-catalpol | a | 55 |
| 33 | Jiofuran | b, d | 53 | 75 | 5-deoxylamiol | a | 63 |
| 34 | Catalpol | a, b, c, d | 64 | 76 | Lamiol | a | 54 |
| 77 | Mussaenosidic Acid | a | 65 |
| 35 | Acetylcatalpol | a, b | 66 | 78 | Genameside C | a | 58 |
| 36 | Ylide A | d | 55 | 79 | 10-Deoxyeucommiol | d | 58 |
| 37 | Ylide B | d | 55 | 80 | Rehmachinin B | d | 58 |
| 38 | Ylide C | d | 55 | 81 | 7-Hydroxy Viteoid II | d | 58 |
| 39 | Furan aldehyde | d | 55 | 82 | (1S,6R,7R,9S)-(−)-7,9-Dihydroxy-9-methyl-3-oxabicyclo [4.3.0] nonan-2-onePiscrosin E | d | 67 |
| 40 | Dihydrocatalpol | a, b, d | 66 |
| 41 | Dihydrocatalpol aglycone | d | 68 | 83 | 7-Hydroxytomentoside | d | 67 |
| 42 | Chlorocatalpol | b, c | 69 | 84 | Frehmaglutoside G | b | 62 |
| 43 | Catalpol aglycone | a | 55 | 85 | 6-O-ssechajugol | b | 61 |
| 44 | 1-methoxy-dihydrocatalpol aglycone | d | 67 | 86 | 8-Dehydro-Artemisinin Acid | a | 58 |
|  |  |  |  |

**Note**: a: Fresh R. glutinosa; b: Raw R. glutinosa; c: Prepared R. glutinosa root; d: R. glutinosa. Leaves; e: Callus tissue of R. glutinosa; f: Diseased root of R. glutinosa


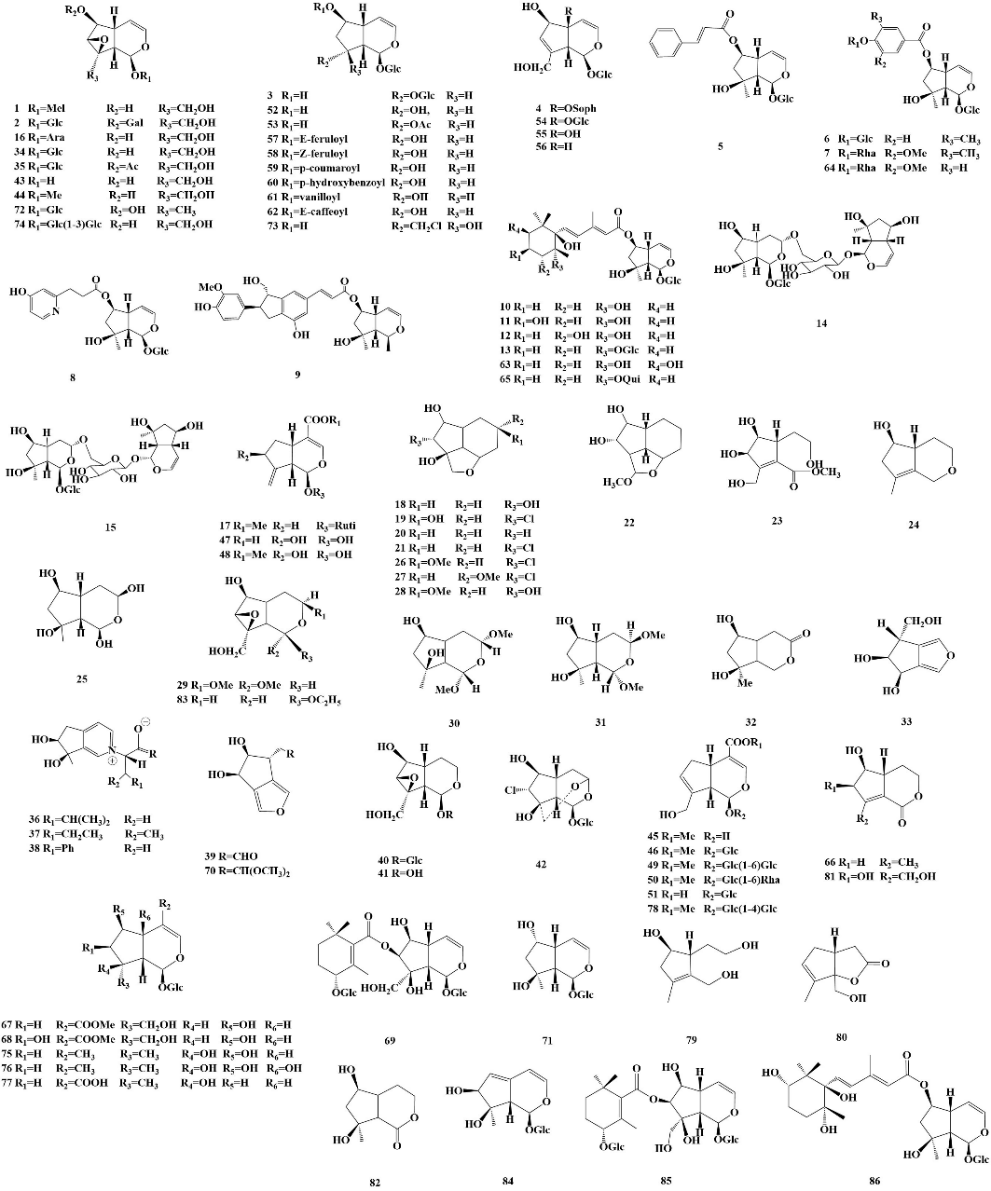


**Supplementary Figure 4** Structures of iridoids from R.glutinosa

**Supplementary Table** **6** Ionones inR. glutinosa

| **No.** | **Compound Name** | **Source** | **Ref** | **No.** | **Compound Name** | **Source** | **Ref** |
| --- | --- | --- | --- | --- | --- | --- | --- |
| 87 | Rehmaionoside A | b | 70 | 104 | Dihydrophaseic acid 4′-O-β-D-glucopyranoside | a | 71 |
| 88 | Rehmaionoside B | b | 70 | 105 | Neorehmannioside A | a | 55 |
| 89 | Rehmaionoside C | b | 70 | 106 | Neorehmannioside B | a | 55 |
| 90 | Aeginetic acid | c | 58 | 107 | Neorehmannioside C | a | 55 |
| 91 | 5-Hydroxyaeginetic acid | c | 58 | 108 | Neorehmannioside D | a | 55 |
| 92 | Melasmic acid | a | 72 | 109 | Neorehmannioside E | a | 55 |
| 93 | Oxyrehmanionoside B | a, b | 72 | 110 | Neorehmannioside F | a | 55 |
| 94 | Rehmapicrosid | c | 70 | 111 | 4-hydroxy β-cyclogeraniol | d | 67 |
| 95 | Dihydroxy-β-ionone | b, c | 58 | 112 | Vomifoliol | d | 67 |
| 96 | Trihydroxy-β-ionone | c | 58 | 113 | (+)-Dehydrovomifoliol | d | 67 |
| 97 | Jiocarotenoside A1 | b | 65 | 114 | Grasshopper ketone | d | 67 |
| 98 | Jiocarotenoside A2 | b | 65 | 115 | Corchoionol | d | 67 |
| 99 | Rehmapicrogenin | c | 58 | 116 | 6′-acetyl rehmapicroside | d | 67 |
| 100 | Rehmapicrogenin A | a | 73 | 117 | 3-methoxy-2,6,6-trimethylcyclohex-  1-enecarboxylic acid | b | 54 |
| 101 | 5,6-dihydroxy-α-ionone | a | 72 | 118 | Frehmaglutin B | a | 61 |
| 102 | Neorehmannioside | b | 74 |
| 103 | Aeginetic acid 5-O-β-D-quinovoside | b | 59 |  |  |  |  |

**Note**: a: Fresh R. glutinosa; b: Raw R. glutinosa; c: Prepared R. glutinosa root; d: R. glutinosa. Leaves; e: Callus tissue of R. glutinosa; f: Diseased root of R. glutinosa


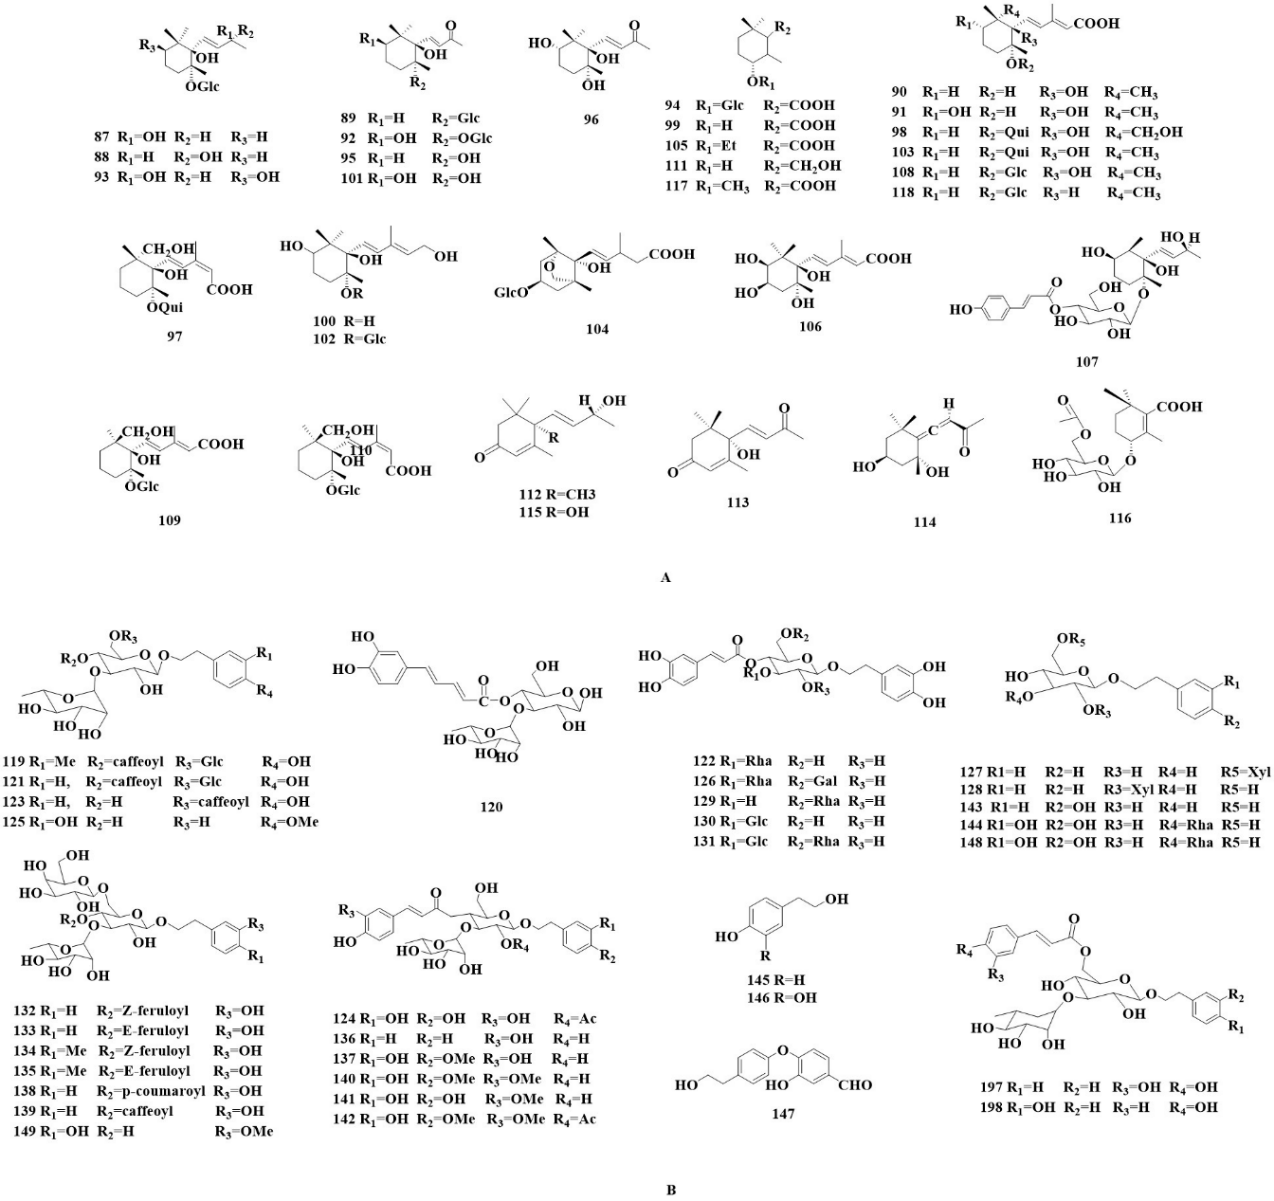


**Supplementary Figure 5** Structures of iridoids(A) and Phenylethanol(B) from R.glutinosa

**Supplementary Table** 7 Phenylethanol in R. glutinosa

| **No.** | **Compound Name** | **Source** | **Ref** | **No.** | **Compound Name** | **Source** | **Ref** |
| --- | --- | --- | --- | --- | --- | --- | --- |
| 119 | Cistanche glycoside A | b | 75 | 135 | Jionoside B2 | b | 75 |
| 120 | Cistanche glycoside F | b | 75 | 136 | Jionoside C | b | 75 |
| 121 | Echinacosid | c | 75 | 137 | Jionoside D | b | 75 |
| 122 | Acteoside | e, b, c | 76 | 138 | Jionoside E | f | 75 |
| 123 | Isoacteoside | b | 75 | 139 | Purpureaside C | b | 76 |
| 124 | 2-acetylacteoside | b | 75 | 140 | Rehmannoside | b | 75 |
| 125 | darendoside B | b | 54 | 141 | Leucosceptoside A | a | 75 |
| 126 | 3,4-dihydroxy-β-phenethyl-O-α-L-rhamnopyranosyl-(1-3)-O-β-D-galacopyranosyl-(1-6)-4-O-  caffeoyl-β-D-glucopyranoside | b | 76 | 142 | Sculponiside | b | 67 |
| 127 | 2-phenylethyl-O-β-D-xylopyranosyl-(1-6)-β-D-glucopyranoside | b | 77 | 143 | Salidroside | b | 67 |
| 128 | 2-phenylethyl-O-β-D-xylopyranosyl-(1-2)-β-D-glucopyranoside | e | 77 | 144 | Verbasoside | a | 77 |
| 129 | Dorsythiaside | e | 76 | 145 | P-hydroxyphenylethyl alcohol | d | 78 |
| 130 | Dihoside A | e | 76 | 146 | 3,4-dihydroxy-phenylethyl alcohol | a | 65 |
| 131 | Dihoside B | c | 76 | 148 | Rehmaglutoside A | a | 79 |
| 132 | Jionoside A1 | b | 75 | 149 | Osmanthuside B6 | b | 79 |
| 133 | Jionoside A2 | c | 75 | 150 | Deacyl-martynoside | b | 67 |
| 134 | Jionoside B1 | b | 75 | 151 | Leonoside F | a | 80 |

**Note**: a: Fresh R. glutinosa; b: Raw R. glutinosa; c: Prepared R. glutinosa root; d: R. glutinosa. Leaves; e: Callus tissue of R. glutinosa; f: Diseased root of R. glutinosa

**Supplementary Table** 8 Triterpenoids in R. glutinosa

| **No.** | **Compound Name** | **Source** | **Ref** |
| --- | --- | --- | --- |
| 152 | Glutinosalactone A | d | 78 |
| 153 | Glutinosalactone B | d | 78 |
| 154 | Glutinosalactone C | d | 78 |
| 155 | Glutinolic acid | d | 81 |
| 156 | 2β,3β,19α-trihydroxyolean-12-ene-13,28-dioic acid | d | 81 |
| 157 | 2β,3β-dihydroxyolean-12-ene-28-oic acid | d | 81 |
| 158 | Oleanolic acid | d | 81 |
| 159 | Ursolic Acid | d | 81 |
| 160 | Oleanonic acid | d | 81 |
| 161 | Diosmetin | d | 81 |
| 162 | Apigenin | d | 81 |
| 163 | Luteolin | d | 81 |
| 164 | Luteolin 7-O-β-D-glucuronide | d | 81 |
| 165 | 7,3′- dihydroxyl - 5′- methoxyiso | d | 81 |

**Note**: a: Fresh R. glutinosa; b: Raw R. glutinosa; c: Prepared R. glutinosa root; d: R. glutinosa. Leaves; e: Callus tissue of R. glutinosa; f: Diseased root of R. glutinosa


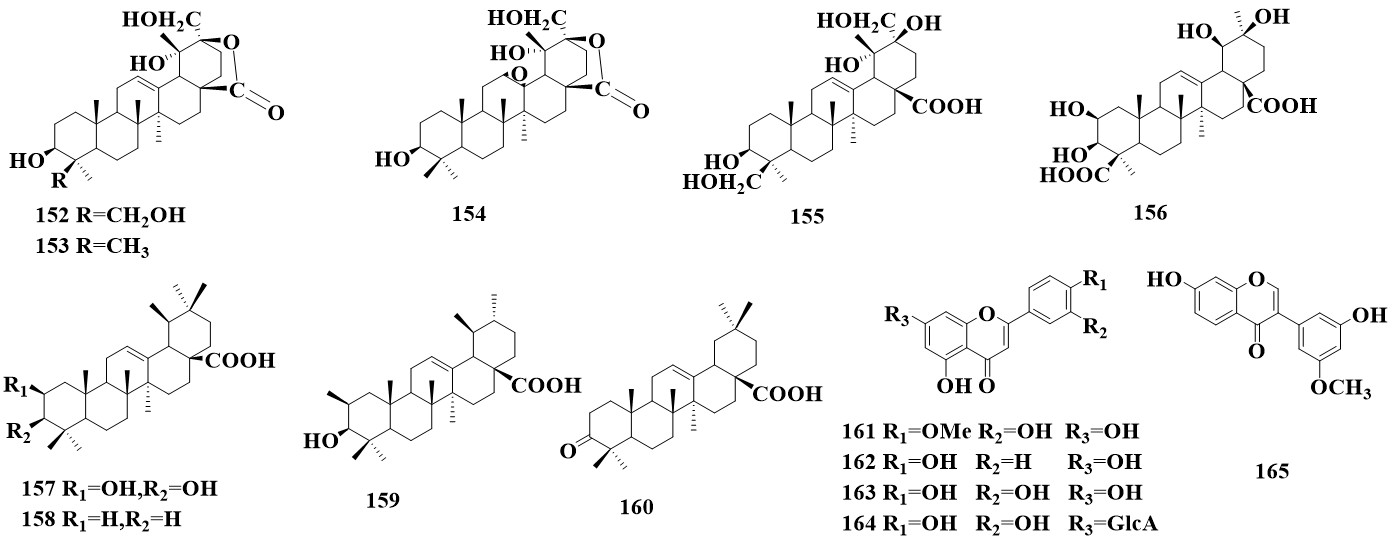


**Supplementary Figure 6** Structures of triterpenoids and flavones from R.glutinosa

**Supplementary Table** 9 Lignans and Phenolic Acids in R. glutinosa

| **No.** | **Compound Name** | **Source** | **Ref** | **No.** | **Compound Name** | **Source** | **Ref** |
| --- | --- | --- | --- | --- | --- | --- | --- |
| 166 | Yemuoside YM 1 | a | 65 | 183 | 2',5'-Dihydroxyacetophenone | b | 82 |
| 167 | Hierochin D | a | 65 | 184 | Homovanillic acid | a | 65 |
| 168 | Lariciresinol-4′-*O*-β-D-glucopyranoside | a | 65 | 185 | Hydrogenated ferulic acid | a | 65 |
| 169 | (+)- (7′S,8S,8′S)-9′-O-[β-glucopyranosid] sesaminone | d | 83 | 186 | Threo-l-(4′-hydroxy-3′-methoxyphenyl)-1,  2,3-propanetriol | a | 65 |
| 170 | guaiacylglycerol-β-  ferulic acid ether | d | 69 | 187 | Dihydroconiferyl alcohol | d | 81 |
| 171 | Neorehmannia lignan A | b | 65 | 188 | 6,7-Dihydroxycoumarin | d | 81 |
| 172 | Neorehmannia lignan B | b | 65 | 189 | 7-O-ethyl guaiacylglycerol | b | 65 |
| 173 | Trans-liovil | b | 65 | 190 | Coniferin | b | 80 |
| 174 | (7R,8S)-4,9,3′-trihydroxy-3-methoxy-7,8-dihydrobenzofuran-1′-propanalyl neolignan | b | 65 | 191 | Ferulic acid methyl ester | b | 80 |
| 175 | Dictamnoside A | d | 84 | 192 | Methyl 4-hydroxycinnamate | b | 80 |
| 176 | Soscopoletin | d | 85 | 193 | 3-Methoxy-4-hydroxycinnamaldehyde | b | 80 |
| 177 | 1-Phenyl-1,2-ethanediol | a | 78 | 194 | pterolactam | b | 80 |
| 178 | p-Hydroxybenzoic acid | d | 65 | 195 | Rhamnopyranosyl vanilloyl | a | 67 |
| 179 | 1,2,4-Benzenetriol | d | 81 | 196 | Syringicacid-4-O-α-L-rhamnopyranoside | a | 67 |
| 180 | Vanillic Acid | a | 65 | 197 | 1,2,3,4-tetrahydro-β-carboline-3-carboxylicacid | b | 65 |
| 181 | Gentiopic acid | d | 81 | 198 | diincarvilone A | b | 80 |
| 182 | Protocatechuic acid | d | 81 |  |  |  |  |

**Note**: a: Fresh R. glutinosa; b: Raw R. glutinosa; c: Prepared R. glutinosa root; d: R. glutinosa. Leaves; e: Callus tissue of R. glutinosa; f: Diseased root of R. glutinosa


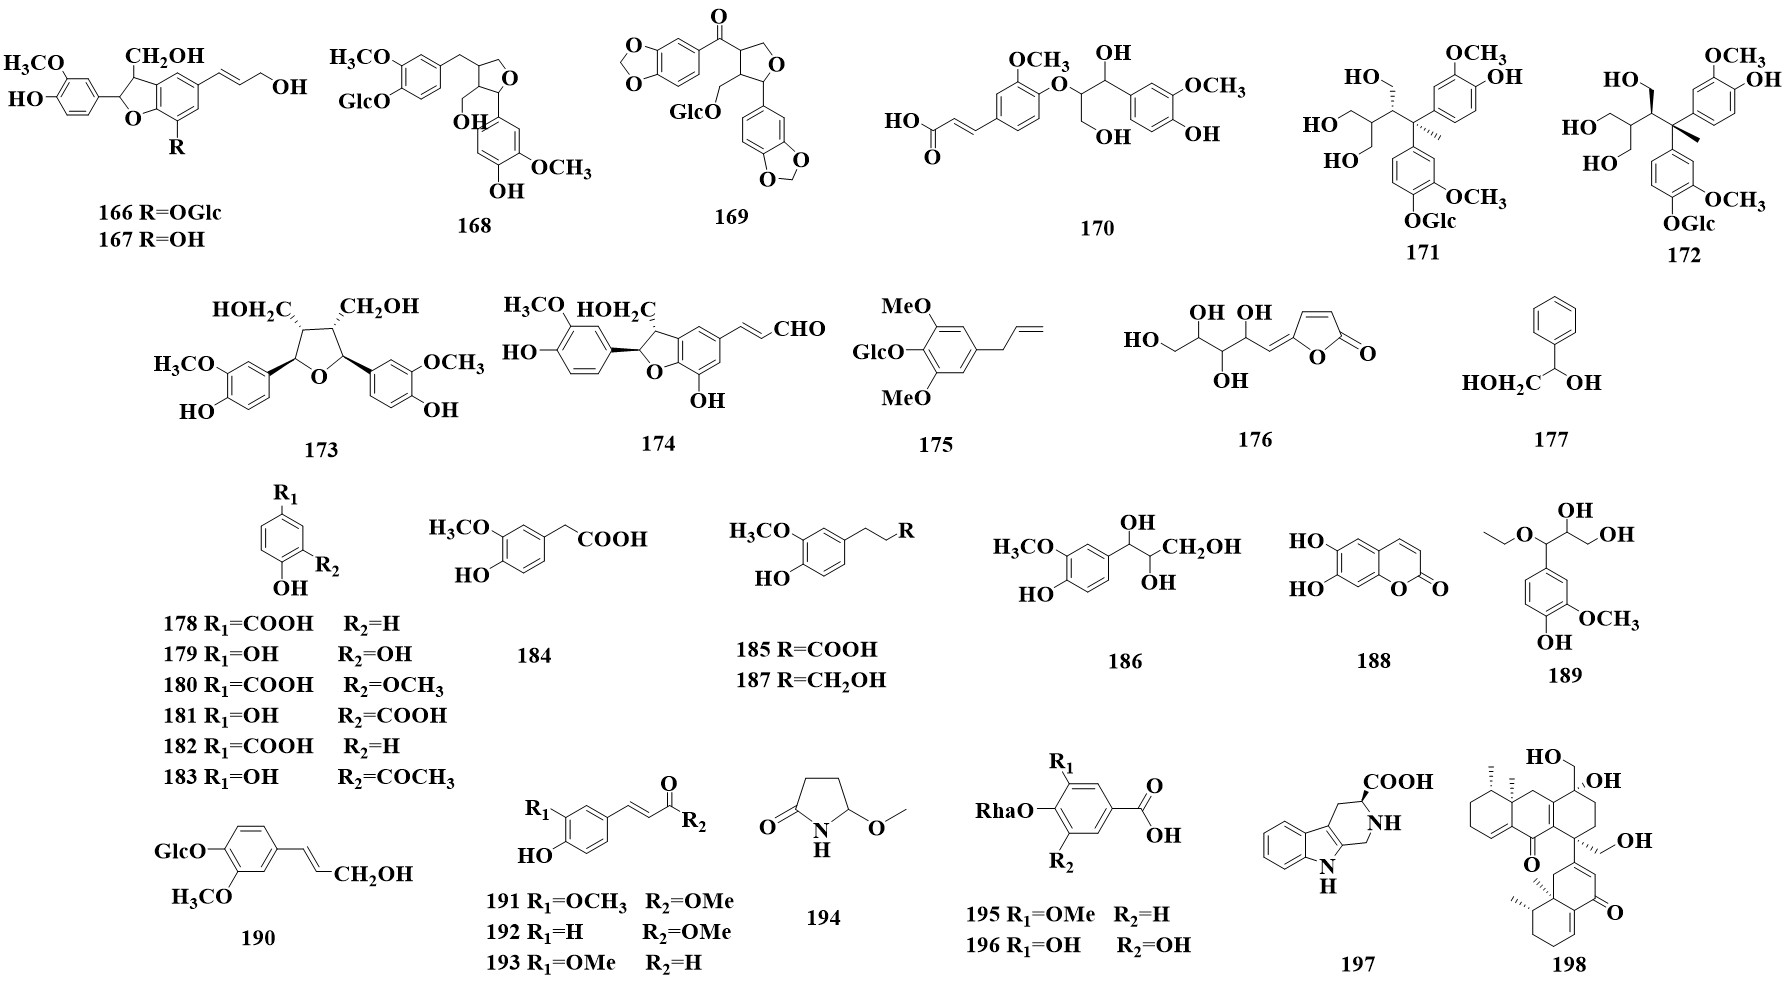


**Supplementary Figure 7** Lignans and phenolic acids from R.glutinosa

**Supplementary Table** 10 Alkaloids and Other Classes in R. glutinosa

| **No.** | **Compound Name** | **Source** | **Ref** |
| --- | --- | --- | --- |
| 199 | 3-methyl-2-(hydroxymethyl)-4H-pyrone-4-one | a | 86 |
| 200 | 3-amino-2-pyridineethanol | a | 86 |
| 201 | (5'S)-2-0xo-N-phenylpyrrolidine-3-carboxamide | a | 86 |

**Note**: a: Fresh R. glutinosa; b: Raw R. glutinosa; c: Prepared R. glutinosa root; d: R. glutinosa. Leaves; e: Callus tissue of R. glutinosa; f: Diseased root of R. glutinosa


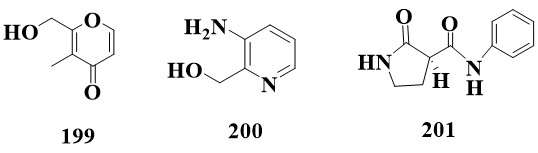


**Supplementary Figure 8** Alkaloids and other Classes from R.glutinosa
